# Supplementary material for: Inner Retinal Layer Changes Reflect Changes in Ambulation Score in Patients with Primary Progressive Multiple Sclerosis
Source: MDPI journal article supplement (doi:10.3390/ijms241612872), 2023-08-17
Supplement: s1 [file s1]

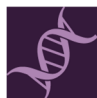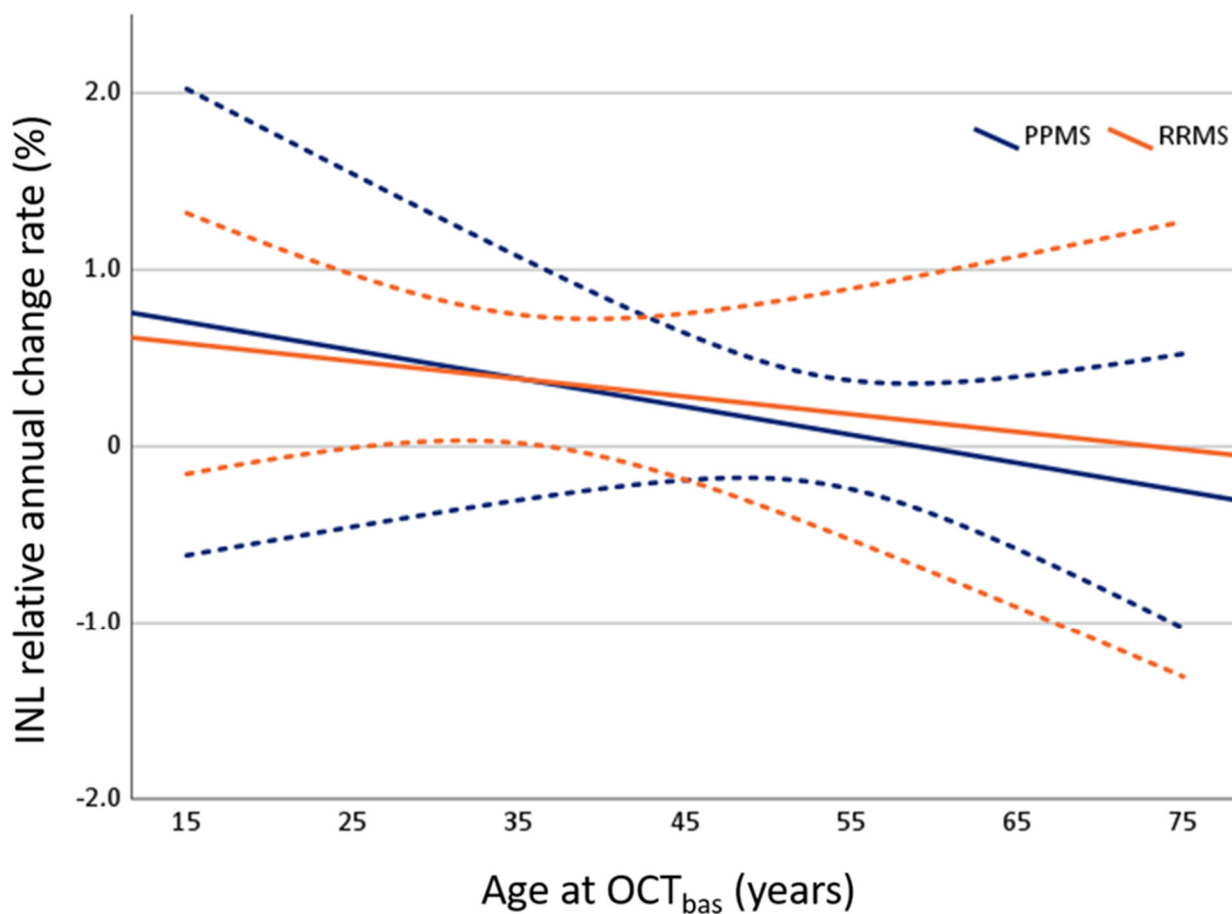

Figure S1: Relative annual change rate of INL in patients with PPMS and RRMS.

Mean relative annual change rate of the macular inner nuclear layer (INL) (in %) is shown for persons with multiple sclerosis (PwMS), either with a relapsing-remitting (RRMS, orange;  $n = 72$  eyes) or a primary progressive course (PPMS, blue;  $n = 61$  eyes) in relation to age at baseline OCT (OCT<sub>bas</sub>) and after exclusion of extreme lower and upper outliers according to Tukey ( $1^{\text{st}}$  quartile- $3 \times \text{IQR}$  < range included <  $1^{\text{st}}$  quartile +  $3 \times \text{IQR}$ ). The 95%-confidence intervals (dotted lines) point out to the difference in age at baseline OCT for the different MS subtypes.
